# Supplementary material for: Template-free synthesis of hierarchical nanocrystal UiO-66 and its adsorption thermodynamics for n-heptane and methyl cyclohexane
Source: Royal Society of Chemistry journal article supplement (doi:10.1039/d1ce00438g), 2021-01-01
Supplement: d1ce00438g1.pdf [file d1ce00438g1.pdf]

## Supporting information

**Table S1. Synthesis conditions of solvothermal reactions to form UiO-66 solid, using ZrCl<sub>4</sub> (8.33mol) and H<sub>2</sub>BDC (8.33 mmol) in presence of different equivalents of NH<sub>4</sub>OH (4M) and HAC per Zr.**

| Sample                    | NH <sub>4</sub> OH /Zr(eq.) | HAC/Zr (eq.) |
|---------------------------|-----------------------------|--------------|
| UiO-66-AS                 | 0                           | 50           |
| UiO-66(0.24, 50)          | 0.24                        | 50           |
| UiO-66(0.48, 50)          | 0.48                        | 50           |
| UiO-66(0.72, 50)          | 0.72                        | 50           |
| UiO-66(0.96, 50)          | 0.96                        | 50           |
| UiO-66(1.92, 50)          | 1.92                        | 50           |
| UiO-66(2.88, 50)          | 2.88                        | 50           |
| UiO-66(3.84, 50)          | 3.84                        | 50           |
| UiO-66(4.80, 50)          | 4.80                        | 50           |
| UiO-66(2.88, 0)           | 2.88                        | 0            |
| UiO-66(2.88, 12.5)        | 2.88                        | 1.25         |
| UiO-66(2.88, 25)          | 2.88                        | 25           |
| UiO-66(2.88, 62.5)        | 2.88                        | 62.5         |
| Zr-MOF-NH <sub>4</sub>    | 0.18 <sup>[1]</sup>         | -            |
| Zr-MOF-NH <sub>4</sub> -1 | 0.18 <sup>[2]</sup>         | -            |
| Zr-MOF-NH <sub>4</sub> -2 | 0.35 <sup>[2]</sup>         | -            |
| Zr-MOF-NH <sub>4</sub> -3 | 0.53 <sup>[2]</sup>         | -            |

The mean particle size was determined by X-ray powder diffraction using the Debye–Scherrer equation, which estimates the particle size from the half width at mid-height of the most intense Bragg peak, namely (111) peaks for UiO-66 (Zr) (Fig. 2). It should be pointed out that the size of UiO-66-AS crystal is too large (>100 nm) to be calculated by Scherrer equation and the crystallite size of UiO-66-AS was figured out according to TEM pictures.

**Table S2 Crystal size dermination of UiO-66 MOFs from the evaluation of XRD patterns using Scherrer's equation**

| Sample             | 2θ (°)  | Radian      | FWHM    | Crystal size, nm |
|--------------------|---------|-------------|---------|------------------|
| UiO-66-AS          | -       | -           | -       | 300              |
| UiO-66(0.96, 50)   | 7.27179 | 0.040399    | 0.23758 | 33.1             |
| UiO-66(1.92, 50)   | 7.3158  | 0.040643    | 0.26992 | 29.1             |
| UiO-66(2.88, 50)   | 7.29015 | 0.040501    | 0.30332 | 25.9             |
| UiO-66(3.84, 50)   | 7.28122 | 0.040451    | 0.33314 | 23.6             |
| UiO-66(4.80, 50)   | 7.28485 | 0.040471    | 0.40598 | 19.4             |
| UiO-66(2.88, 0)    | 7.34913 | 0.128266516 | 2.12962 | 3.69             |
| UiO-66(2.88, 12.5) | 7.36384 | 0.128523254 | 1.75934 | 4.47             |
| UiO-66(2.88, 25)   | 7.2957  | 0.127333986 | 0.59319 | 13.24            |

Pressure range selected requires that not only the quantity of  $C$  constant must be positive, but the application of the BET equation should be limited to the pressure range where the term  $V(P-P_0)$  or alternatively  $V(1-P/P_0)$  continuously increases with  $P/P_0$  ( $V$  is the adsorbed amount) according to criteria suggested by IUPAC recently<sup>[3]</sup>. As can be seen in Figure S1, it is clearly visible that all data points above a relative pressure of 0.05 have to be eliminated for application of the BET equation.

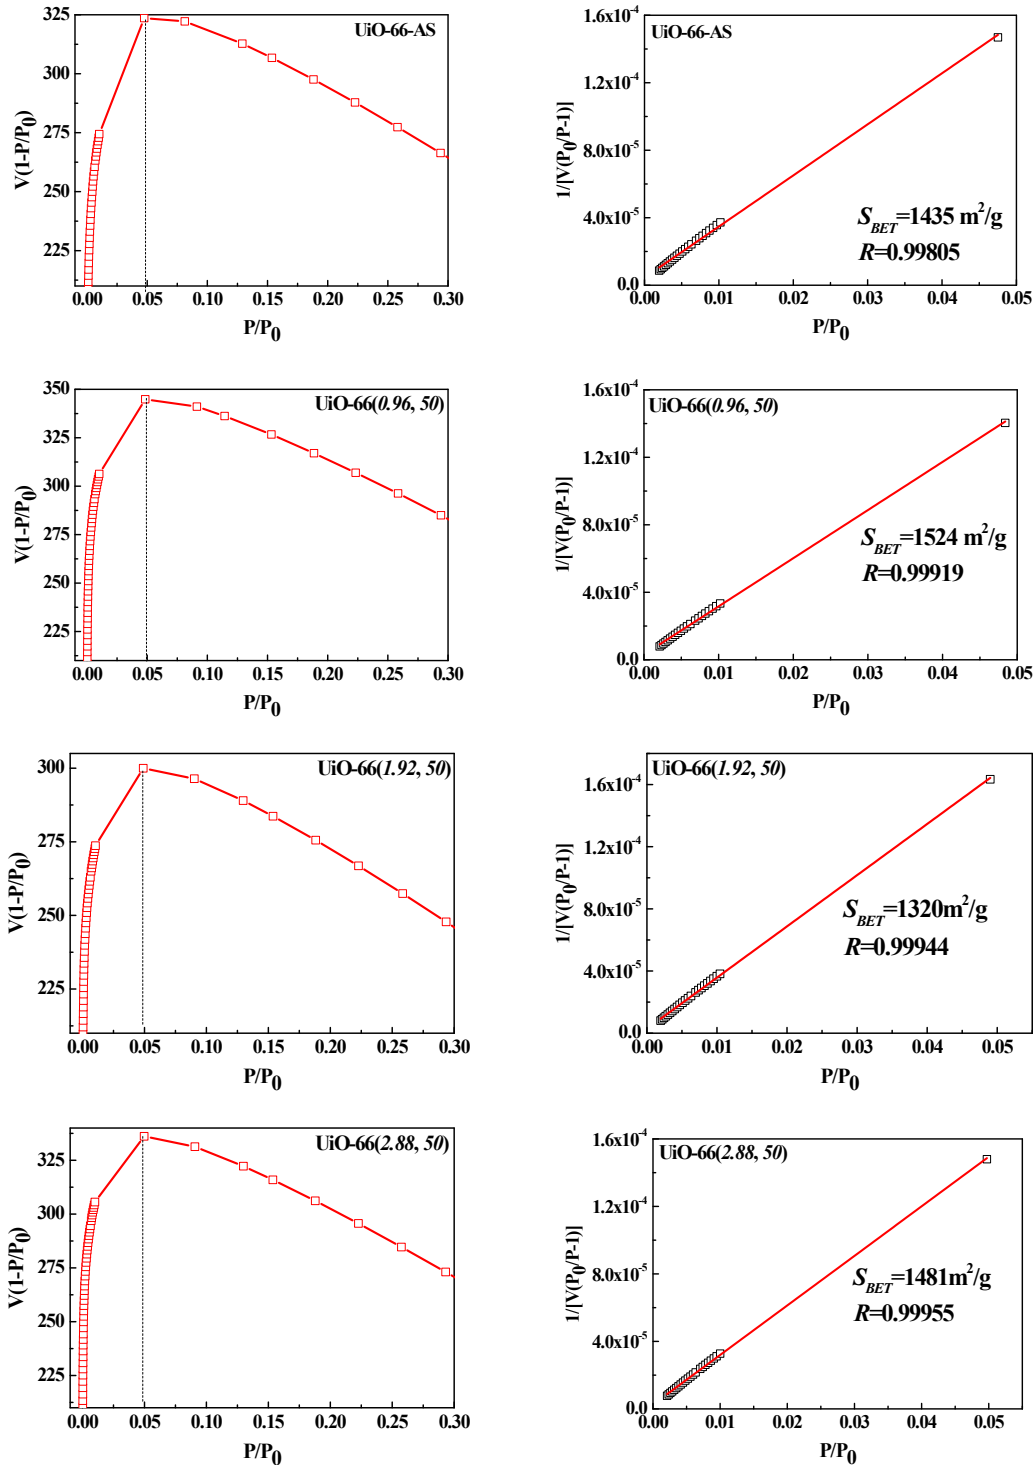

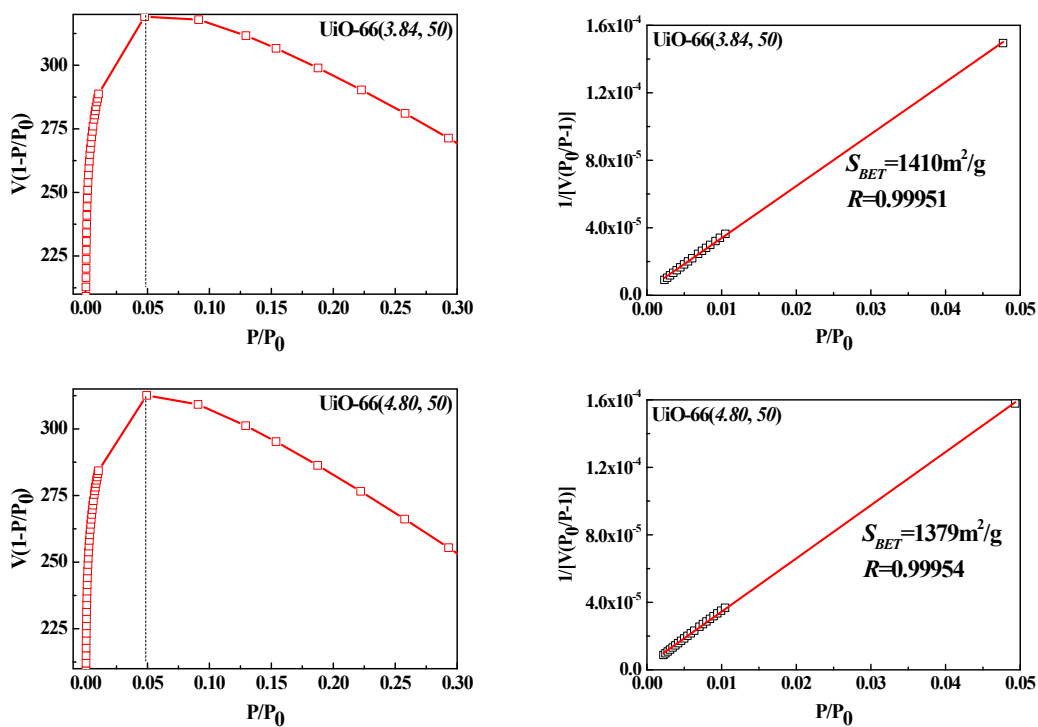

Figure. S1 Procedure of determination of the linear relative pressure range for BET analysis and BET plot for the selected linear data points.

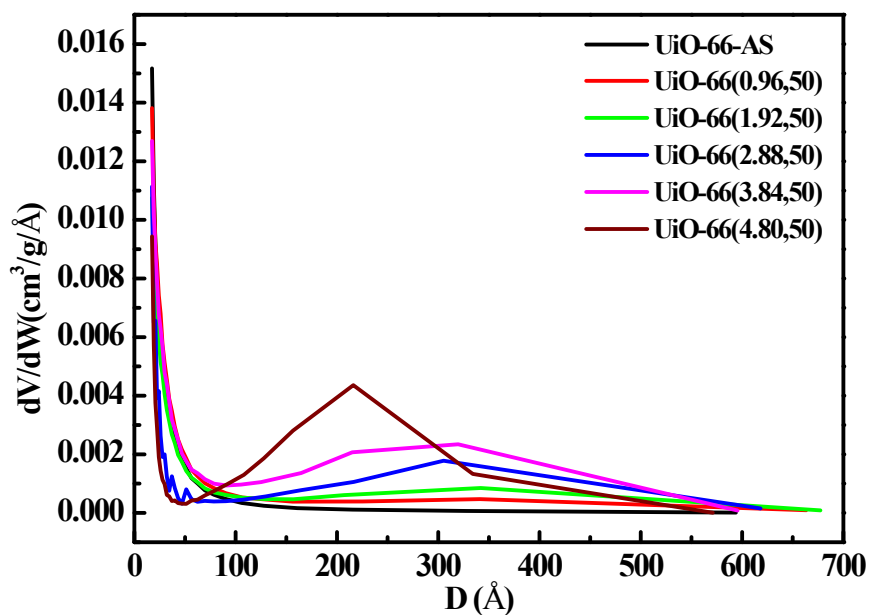

Figure S2 Pore size distributions (PSDs) calculated from desorption branch of  $N_2$  isotherm by using BJH method.

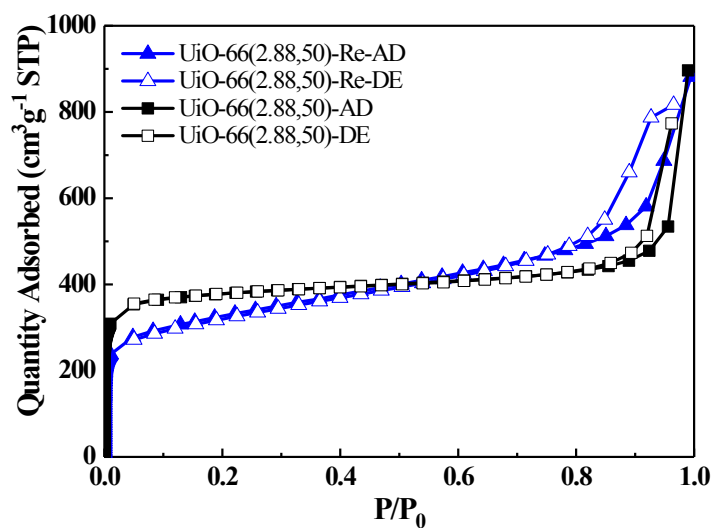

Figure S3 N<sub>2</sub> adsorption/desorption isotherms of UiO-66(2.88, 50) before and after MCH/nHEP sorption experiments at 77 K

### Reference

- [1] H.R. Abid, G.H. Pham, H.M. Ang, J. Colloid Interface Sci. **2012**, 366, 120-124.
- [2] H.R. Abid, H.M. Ang, S. Wang, Nanoscale **2012**, 4, 3089-3094.
- [3] J. Moellmer, E.B. Celer, R. Luebke, Microporous Mesoporous Mater. **2010**, 129, 345-353.
